# Supplementary material for: Three-dimensional total-internal reflection fluorescence nanoscopy with nanometric axial resolution by photometric localization of single molecules
Source: PubMed Central journal article supplement (PMC7822951; doi:10.1038/s41467-020-20863-0), 2021-01-22
Supplement: 41467_2020_20863_MOESM4_ESM.pdf [file 41467_2020_20863_MOESM4_ESM.pdf]

The full content of this file cannot be displayed with your current PDF viewer. Please update to the latest possible version to view this document.
